# Supplementary material
Source: HighWire-hosted journal article supplement (https://www.cmaj.ca/highwire/filestream/58874/field_highwire_adjunct_files/0/image-eczema-1-at.pdf)
Supplement: image-eczema-1-at.pdf [file image-eczema-1-at.pdf]

**Appendix 1: Resolution of vesicles with desquamation in a 57-year-old man with dyshidrotic eczema following intravenous immunoglobulin for chronic inflammatory demyelinating polyneuropathy.**

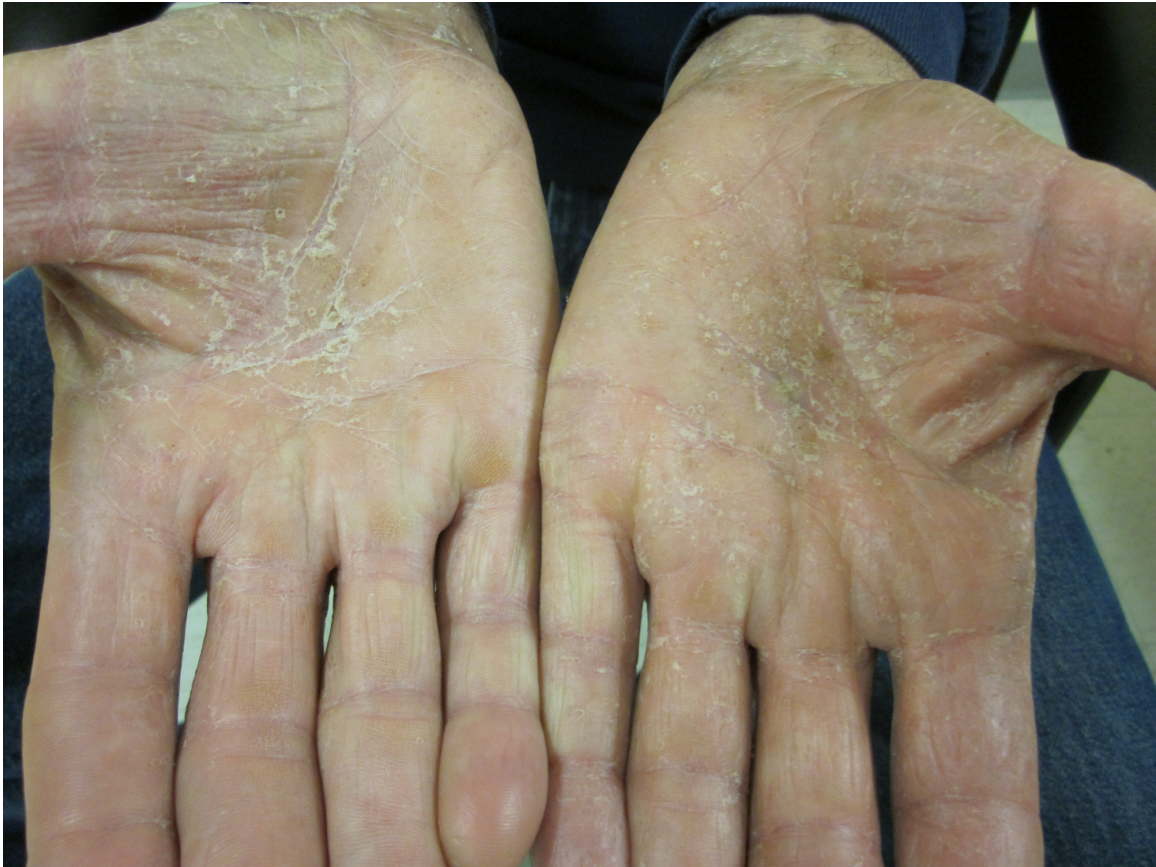

Appendix to: Lee KC, Ladizinski B. Dyshidrotic eczema following intravenous immunoglobulin treatment.

*CMAJ* 2012. DOI: 10.1503/cmaj.121036.

Copyright © 2013 The Author(s) or their employer(s).

To receive this resource in an accessible format, please contact us at [cmajgroup@cmaj.ca](mailto:cmajgroup@cmaj.ca).
